# Supplementary material for: A Mass Conservative Kalman Filter Algorithm for Computational Thermo-Fluid Dynamics
Source: MDPI journal article supplement (doi:10.3390/ma11112222), 2018-11-08
Supplement: s1 [file s1]

# **A Mass Conservative Kalman Filter Algorithm for Computational Thermo-Fluid Dynamics**

**Supplementary Materials could be found by the following link:**

[https://figshare.com/articles/An\\_implementation\\_of\\_the\\_mass\\_conservative\\_Kalman\\_Filter\\_for\\_computational\\_thermo-fluid\\_dynamics\\_/7177004](https://figshare.com/articles/An_implementation_of_the_mass_conservative_Kalman_Filter_for_computational_thermo-fluid_dynamics_/7177004).
